# Supplementary material
Source: Springer Nature journal article supplement (https://www.springermedizin.de/resource/supplementary/12985_2013_2545_MOESM5_ESM.pdf/9606942)
Supplement: MOESM5 [file 9606942]

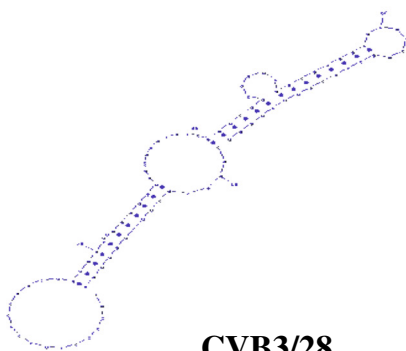

**CVB3/28**

$\Delta G = -79.3$  [initially  $-22.91$ ] 78

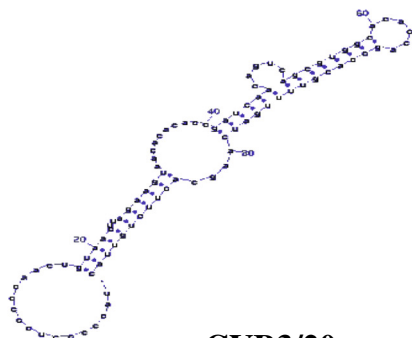

**CVB3/20**

$\Delta G = -70.3$  [initially  $-22.93$ ] 70

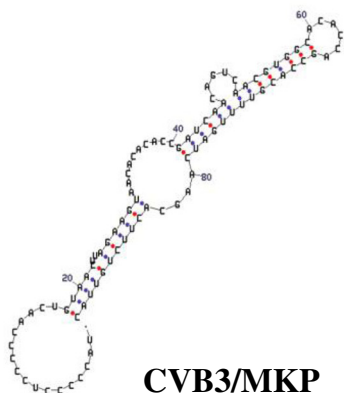

**CVB3/MKP**

©2025 by D. Stewart and M. Zuker  
©2007 Washington University  
 $\Delta G = -42.9$  [initially  $-22.9$ ] MKP

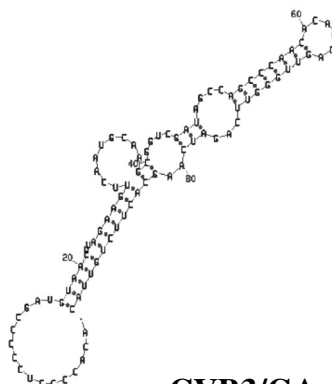

**CVB3/GA**

©2025 by D. Stewart and M. Zuker  
©2007 Washington University  
 $\Delta G = -29.7$  [initially  $-20.71$ ] 68

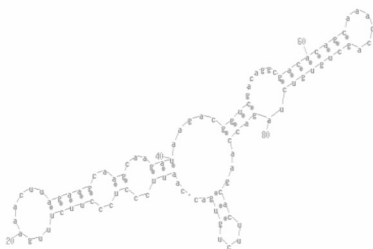

**CVB3/CO**

$\Delta G = -23.2$  [initially  $-23.21$ ] 63

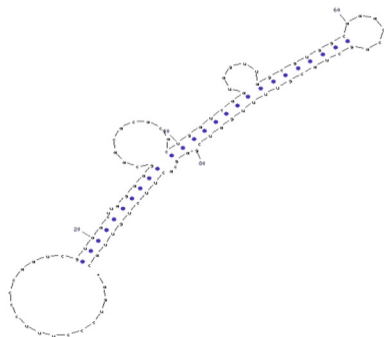

**CVB3/AS**

$\Delta G = -20.1$  [initially  $-20.11$ ] 65
